1 **Title:** Expansion of a fly TBI model to four levels of injury severity reveals synergistic effects of  
2 repetitive injury for moderate injury conditions

3 **Authors:** Lauren J Putnam\*, Ashley M Willes\*, Brooke E Kalata\*, Nathaniel D Disher\*, Douglas J  
4 Brusich

5 \* = authors contributed equally to this work

6 **Author Affiliations:** Human Biology, College of Science, Engineering, and Technology, University  
7 of Wisconsin – Green Bay, Green Bay, WI, USA

8 **Corresponding Author:** Dr. Douglas J Brusich, [brusichd@uwgb.edu](mailto:brusichd@uwgb.edu)

9

10 **Running Title:** Expansion of a fly TBI model and synergistic effects

11

## Expansion of a fly TBI model and synergistic effects

### 12 **ABSTRACT**

13 Several million traumatic brain injury (TBI) events are reported in the United States annually.  
14 However, mild TBI events often go unreported, and mild and repetitive mild TBI conditions are  
15 challenging to model. Fruit flies have gained traction for the study of TBI. The best-  
16 characterized fly TBI model is the high-impact trauma (HIT) method. We replicated the HIT  
17 method and confirmed several previous findings at the standard level of injury severity. We then  
18 expanded upon the HIT model by characterizing mortality across three reduced levels of injury  
19 severity. Importantly, we found reduced mortality with reduced injury severity and synergistic  
20 effects on mortality in response to repetitive TBI by our moderate injury conditions. Thus, we  
21 have extended a well-characterized model of TBI in flies, and shown the utility of this model for  
22 making unique insights into TBI at various severities and upon repetitive injury.

23

24 **Keywords:** traumatic brain injury, TBI, repetitive injury, mortality, flies, Drosophila,  
25 injury severity

## 26 **INTRODUCTION**

27 In the United States, traumatic brain injury (TBI) annually accounts for greater than 2.5 million  
28 emergency room (ER) visits, hospitalizations, and deaths combined (Taylor et al. 2017).  
29 Additionally, half of all mild TBI events are estimated to go unreported (Cassidy et al. 2004).  
30 Mild TBI events, including concussion and sub-concussive impacts, are commonly suffered  
31 during sports participation and military deployment (Marar et al. 2012; Helmick et al. 2015; Kerr  
32 et al. 2017; Baldwin et al. 2018). Individuals in contact sports such as football may experience  
33 greater than one thousand mild head impacts per year, while approximately 10% of U.S. Army  
34 soldiers reported multiple mild TBI events from a previous deployment (Crisco et al. 2010; Wilk  
35 et al. 2012).

36 Severe TBI events are associated with long-term outcomes including greater risk for dementia,  
37 and are associated with many hallmarks of neurodegenerative disease (DeKosky and Asken  
38 2017; Nordström and Nordström 2018). Individual mild TBI events are not well-linked to long-  
39 term outcomes, and most TBI-associated conditions resolve within months, particularly in  
40 children (Holm et al. 2005). By contrast, repetitive mild TBI is associated with more prominent  
41 impairment or disease, such as a greater risk of neurodegenerative disease in American football  
42 players (Lehman et al. 2012; Bailes et al. 2013; Levin and Robertson 2013). Moreover, rodent  
43 models of repetitive mild TBI result in neurocognitive deficits, and histological and morphological  
44 changes associated with neurodegenerative disease (Mouzon et al. 2012; Ojo et al. 2016; Gold  
45 et al. 2018). Importantly, additional TBI events suffered within days of the first injury result in  
46 more negative outcomes due to the combination of primary and secondary injury mechanisms  
47 (Laurer et al. 2001; Longhi et al. 2005; Friess et al. 2009; Meehan et al. 2012; Huang et al.  
48 2013; Bolton and Saatman 2014; Weil et al. 2014; Bolton Hall et al. 2016).

49 Two models for studying TBI have been developed for the fruit fly (*Drosophila melanogaster*):  
50 the high-impact trauma (HIT) method, which uses a spring-based device deflected to 90°, and  
51 the Bead Ruptor homogenizer method, which uses a programmable homogenizer that can be  
52 set to various speeds and durations (Katzenberger et al. 2013; Barekat et al. 2016). Importantly,  
53 use of each method results in classic post-TBI symptoms including impaired locomotion,  
54 shortened lifespan, neurodegeneration, intestinal barrier disruption, and activation of immune  
55 and autophagy processes (Katzenberger et al. 2013; Barekat et al. 2016; Anderson et al. 2018).  
56 While the Bead Ruptor method offers potential advantages in the ease of scaling primary  
57 injuries and inter-experiment standardization, the HIT method is simple, cost-effective, and  
58 better characterized to date (Katzenberger et al. 2013, 2015, 2016; Barekat et al. 2016;

## Expansion of a fly TBI model and synergistic effects

59 Anderson et al. 2018). We sought to standardize the HIT method across several levels of injury  
60 severity, thereby extending this well-characterized method to the study of mild to severe TBI  
61 events in an easily replicable manner. To this end, we installed fixed, selectable stopping points  
62 that limited deflection of the HIT device to either 60°, 70°, 80°, or 90°. We found that reducing  
63 the angle of deflection greatly reduced mortality, and that repetitive injury, particularly at  
64 moderate levels of severity, resulted in a pronounced synergistic effect on mortality.

## Expansion of a fly TBI model and synergistic effects

### 65 **MATERIALS AND METHODS**

#### 66 Fly Husbandry

67 Flies of genotype  $w^{1118}$  (BL 5905) and  $y^1w^1$  (BL 1495) were obtained from the Bloomington  
68 Drosophila Stock Center (Bloomington, Indiana, USA). Flies were maintained in a 25°C  
69 humidified incubator on a 12H:12H light:dark cycle. Flies were maintained on a glucose-  
70 cornmeal-yeast media with the following quantities per 1.25L of water: 7.66g agar (Apex), 14.4g  
71 glucose (DOT Scientific Inc.), 50.3g cornmeal (Genesee), 15g yeast (Genesee), 5.66mL  
72 tegosept (Genesee), 4.67mL propionic acid (99%, Acros Organics), and 0.47mL phosphoric  
73 acid (85%, Matheson Coleman & Bell Inc.).

#### 74 TBI Methodology

75 Flies were collected using light-CO<sub>2</sub> anesthesia. Flies were subjected to traumatic brain injury  
76 on or before 5 days after eclosion (dae) using an adapted model of the high-impact trauma  
77 (HIT) device (Katzenberger et al. 2013). Briefly, flies were transferred to an empty vial and the  
78 vial was affixed to the end of a compression spring. The vial was deflected to a selectable, fixed  
79 stopping point of 60°, 70°, 80° or 90°. The vial was released and allowed to collide with a foam  
80 pad covered by a 1/16" rubber pad. Vial deflections were repeated every 15 seconds for the  
81 total number of deflections indicated. Flies were immediately hand-transferred to a food vial  
82 following the final injury. Uninjured flies were handled identically minus spring deflection and  
83 injury. Flies were counted at 24-hours post-injury to determine the number of dead and living  
84 flies for calculation of the mortality index at 24-hours (MI<sub>24</sub>) (MI<sub>24</sub> = # flies dead at 24-hours post-  
85 injury/total # flies \* 100). The MI<sub>24</sub>/HIT values were determined using the MI<sub>24</sub> divided by total  
86 number of injuries for the condition.

#### 87 Statistics

88 All statistical testing was conducted using GraphPad Prism 7 software (GraphPad Software,  
89 Inc.). Categorical (dead:alive) count data were compared using a 2x2 Fisher's Exact test  
90 between selected conditions. Bonferroni correction was used to correct for multiple testing and  
91 corrected alpha levels are reported in figure legends. Comparisons of median MI<sub>24</sub>/HIT values  
92 were conducted via Kruskal-Wallis testing with multiple comparisons of mean ranks and Dunn's  
93 correction at a level of  $\alpha = 0.05$ . Only vials containing at least 30 flies were used in median  
94 MI<sub>24</sub>/HIT comparisons. Full count data were used for comparisons of trends across MI<sub>24</sub>/HIT  
95 data; overall MI<sub>24</sub> values were divided by their respective HIT number, plotted across 1-4HITs,

## Expansion of a fly TBI model and synergistic effects

96 and fitted using the linear fit mode within the nonlinear regression analysis toolkit (GraphPad  
97 Prism 7). Lines were fitted using the least squares fit mode, compared to a hypothetical slope of  
98 zero via the extra sum-of-squares F test at a level of  $\alpha = 0.05$ , and the 95% confidence interval  
99 (CI) determined asymmetrically.

## Expansion of a fly TBI model and synergistic effects

### 100 **RESULTS**

#### 101 Replication of 90° HIT data

102 The primary measure of TBI outcomes in flies is the percentage of flies that die within 24-hours  
103 post-injury ( $MI_{24}$ ). We first set out to determine how our TBI system and resulting  $MI_{24}$  values  
104 compared to existing models. We conducted experiments using a 90° angle of deflection and  
105 two strains of fruit fly,  $w^{1118}$  and  $y^1w^1$ , for which  $y^1w^1$  was previously reported to suffer higher  
106  $MI_{24}$  (Katzenberger et al. 2013). Vials of flies were subjected to 0-4 high-impact traumatic  
107 injuries (HITs) (see Table 1 for all categorical count data). Uninjured flies suffered little or no  
108 mortality at 24-hours, while administration of 1-4HITs resulted in pronounced  $MI_{24}$  with  
109 increased death upon increased HIT number (Fig. 1A, shared letters indicate statistical  
110 significance between conditions). Comparisons across genotypes showed  $MI_{24}$  values of  $w^{1118}$   
111 and  $y^1w^1$  flies were no different for uninjured controls, but  $y^1w^1$  flies suffered greater mortality  
112 than  $w^{1118}$  flies for each of the 1-4HIT datasets (Fig. 1A, (\*) indicates differences between  
113 genotypes).

114 It was previously reported that  $MI_{24}$  values divided by HIT number ( $MI_{24}/HIT$ ) and compared  
115 across HITs were no different from one another (Katzenberger et al. 2013). We carried out the  
116 same comparisons for our datasets and found differences for median  $MI_{24}/HIT$  values for  $w^{1118}$   
117 (Fig. 1B, 1HIT vs 3HIT) and  $y^1w^1$  (Fig. 1C, 1HIT vs 3HITs, and 1HIT vs 4HITs). The differences  
118 in  $MI_{24}/HIT$  prompted us to look more closely at the pattern of change in mortality across HIT  
119 numbers. If mortality is directly proportional to the number of flies which experience a critical  
120 injury for each HIT then we would expect the  $MI_{24}/HIT$  values compared across HIT numbers to  
121 have a zero slope. We used overall count data to determine  $MI_{24}/HIT$  values and then fitted  
122 these points across 1-4 HITs with a linear best-fit model. At 90° we found that neither  $w^{1118}$  nor  
123  $y^1w^1$  had slopes that significantly deviated from zero (Table 2).

#### 124 Expansion to three levels of reduced injury severity

125 In order to expand the range of primary injury severities by the HIT method, we added  
126 additional, fixed, selectable stopping points to reduce the angle of deflection to 80°, 70°, or 60°.  
127 We again assessed  $MI_{24}$  outcomes by independently administering 1-4HITs at each of the three  
128 new angles of deflection. We found lower  $MI_{24}$  values in each of the new deflection angles when  
129 compared to 90° within both  $w^{1118}$  and  $y^1w^1$  datasets at each of 1-4HITs (Fig. 2A-D respectively).  
130 We also found significantly reduced  $MI_{24}$  with each reduction in deflection angle from 80° to 70°  
131 and then 70° to 60° at each of 2-4 HITs within both  $w^{1118}$  and  $y^1w^1$  datasets (Figs. 2B-D), while

## Expansion of a fly TBI model and synergistic effects

132 genotype-specific differences across deflection angle were seen at 1HIT (Fig. 2A). Moreover, in  
133 both genotypes we found the  $MI_{24}$  from 1HIT at  $60^\circ$ , our most mild injury severity, was not  
134 significantly different than the  $MI_{24}$  in uninjured animals using a significance level of  $\alpha = 0.005$   
135 after Bonferroni correction (Fig. 2A, p-values:  $w^{1118} = 0.39$ ,  $y^1w^1 = 0.03$ ). Last, we found  $y^1w^1$   
136 flies suffered greater mortality than  $w^{1118}$  flies at all deflection angles when 3 or 4 HITs were  
137 administered (Figs. 2C and 2D). However, differences between genotypes were only statistically  
138 different at the  $80^\circ$  and  $90^\circ$  deflection angles when injuries were limited to 1 or 2 HITs (Figs. 2A  
139 and 2B). Nonetheless,  $y^1w^1$  flies appeared comparatively more sensitive to TBI at less severe  
140 primary injuries as the fold-difference in  $y^1w^1:w^{1118}$   $MI_{24}$  values progressively decreased from  
141 3.84-fold at  $60^\circ$  to 1.53-fold at  $90^\circ$  for 4HITs (Fig. 2D), a pattern similarly observed for other HIT  
142 numbers.

### 143 Synergistic effects are apparent for repetitive injury at moderate TBI severity

144 We continued our analysis of the additional deflection angles to comparisons of  $MI_{24}/HIT$  values.  
145 We found differences in  $MI_{24}/HIT$  values when comparing 1HIT and 4HITs in both  $w^{1118}$  and  $y^1w^1$   
146 at each of the sub- $90^\circ$  deflection angles (Fig. 3). Additionally, differences between both 1HIT  
147 and 3HITs, and 2HITs and 4HITs were also seen for  $w^{1118}$  at  $80^\circ$  (Fig. 3A) and  $y^1w^1$  at  $70^\circ$  (Fig.  
148 3D). We again investigated trends in  $MI_{24}/HIT$  data from 1-4HITs via analysis of slopes from  
149 best-fit lines. If mortality was strictly additive for each HIT then the trend across  $MI_{24}/HIT$  data  
150 should generate a zero-slope line. However, at both  $80^\circ$  and  $70^\circ$ , but not  $60^\circ$ , both  $w^{1118}$  and  
151  $y^1w^1$  had positive, significantly non-zero slopes, indicating a synergistic effect on mortality  
152 (Table 2). The positive slopes and synergistic effects were most evident at moderate severity  
153 injuries of  $80^\circ$  for  $w^{1118}$  ( $1.82 \pm 0.05$  (SE)) and  $70^\circ$  for  $y^1w^1$  ( $2.08 \pm 0.42$  (SE)) (Table 2).



## Expansion of a fly TBI model and synergistic effects

### 154 **DISCUSSION**

155 Fruit flies offer an accessible model to study TBI. Two models of conducting TBI studies in fruit  
156 flies are the high-impact trauma (HIT) method and the Bead Ruptor method (Katzenberger et al.  
157 2013; Barekat et al. 2016). One advantage to the Bead Ruptor method is the ease of scaling the  
158 primary injuries (Barekat et al. 2016). We addressed this gap in methodology and expanded  
159 upon the original HIT method by adding selectable stopping points to reproducibly perform injury  
160 at four levels of injury severity.

161 Several of our main findings are in agreement with the established TBI models. First, we found  
162 that increasing the injury number results in dose-dependent increases in mortality (Figs. 1 and  
163 3) (Katzenberger et al. 2013; Barekat et al. 2016; Anderson et al. 2018). Second, we found that  
164  $y^1w^1$  flies suffer greater mortality than  $w^{1118}$  flies subjected to the same injuries, and we  
165 extended this finding to our mild and moderate TBI conditions (Figs. 1 and 2) (Katzenberger et  
166 al. 2013). Third, we found that reducing the angle of deflection resulted in less severe primary  
167 injuries as indicated by decreased mortality, and extended this finding across the four levels of  
168 deflection tested (Fig. 2) (Anderson et al. 2018).

169 Our main findings were consistent yet not identical to published literature. Published reports  
170 show  $MI_{24}$  values of less than ~30% and ~50% for  $w^{1118}$  and  $y^1w^1$  flies, respectively, when  
171 subjected to 4HITs at 90° (Katzenberger et al. 2013; Anderson et al. 2018). By our analogous  
172 studies at 4HITs and 90°, we calculated  $MI_{24}$  scores of 53.3% and 81.6% for  $w^{1118}$  and  $y^1w^1$  flies  
173 respectively (Fig. 1 and Table 1). These differences across studies are likely due to lab-specific  
174 variation in the force generated by the spring and/or the features of the collision surface.  
175 However, it is notable that we reproduced the data showing increased sensitivity of  $y^1w^1$  flies  
176 (Katzenberger et al. 2013). The mechanisms underlying the differences between  $w^{1118}$  and  $y^1w^1$   
177  $MI_{24}$  values are unknown, but are likely due to multiple quantitative trait loci, though precise  
178 genetic factors have remained elusive (Katzenberger et al. 2015). Thus, while absolute  $MI_{24}$   
179 values may vary between labs, genetic background effects are strong enough to be conserved,  
180 which speaks to the reproducibility of this TBI model.

181 A notable advance by our TBI model is identification of the synergistic effect of additional HITs  
182 on mortality by our moderate TBI conditions (Table 2). It was previously reported that dividing  
183 the  $MI_{24}$  by the number of HITs resulted in no differences when comparing across HIT number  
184 (Katzenberger et al. 2013). This result was used as evidence that the main factor influencing  
185  $MI_{24}$  across multiple HITs was the likelihood of suffering a critical injury for each HIT, and that

## Expansion of a fly TBI model and synergistic effects

186 secondary injury mechanisms were negligible for injuries spaced closely together (Katzenberger  
187 et al. 2013). By contrast, we found differences when comparing median  $MI_{24}/HIT$  values (Figs.  
188 1B, 1C, 3A-F). Additionally, we looked more closely at the pattern of  $MI_{24}/HIT$  values across HIT  
189 number. If only primary injuries, and not secondary injuries or increased susceptibility to  
190 mortality due to preceding strikes, were responsible for observed  $MI_{24}$  values then the  $MI_{24}/HIT$   
191 values across HIT number should generate a zero slope line. At  $90^\circ$  neither  $w^{1118}$  nor  $y^1w^1$  had  
192 significantly non-zero best-fit line slopes, consistent with properties of the primary injury being  
193 most responsible for  $MI_{24}$  at these severe injury levels and short inter-injury interval (Table 2).  
194 By contrast, for our moderate severity injuries at  $80^\circ$  and  $70^\circ$ , both  $w^{1118}$  and  $y^1w^1$   $MI_{24}/HIT$  data  
195 generated positive, significantly non-zero slopes, indicating a synergistic effect of HIT number  
196 on mortality. This result suggests that secondary injury mechanisms, or increased susceptibility  
197 to injury due to preceding injuries, contributed to  $MI_{24}$  (Table 2). A non-zero trend in  $MI_{24}/HIT$   
198 data was not observed for injuries at  $60^\circ$ , though it is possible that such a trend would be  
199 evident if injury number was further increased as the  $MI_{24}$  value increased noticeably between 3  
200 and 4 HITs for both  $w^{1118}$  and  $y^1w^1$  (Table 2).

201 Our analysis showing synergistic effects of multiple injuries at a short inter-injury interval (15  
202 seconds) is novel. The secondary injury window in flies reportedly peaks between 1 and 8 hours  
203 (Katzenberger et al. 2016). In mammals the secondary injury window is typically reported as  
204 within days post-injury (Laurer et al. 2001; Longhi et al. 2005; Friess et al. 2009; Meehan et al.  
205 2012; Huang et al. 2013; Bolton and Saatman 2014; Weil et al. 2014; Bolton Hall et al. 2016).  
206 However, the number of sub-concussive events suffered by individuals across a short time-  
207 scale, a single American football game, correlated with short-term blood-brain-barrier damage  
208 (Marchi et al. 2013). Thus, mild TBI events suffered in number across a short time-scale may be  
209 an important factor to consider for brain health, especially considering the large number  
210 (> 1,000) of sub-concussive injuries suffered during football participation across a season of  
211 play (Crisco et al. 2010).

212 What are the mechanisms by which closely spaced, mild or moderate injuries synergistically  
213 affect TBI outcomes? Secondary mechanisms might include autophagy-related pathways and  
214 stress granule formation (Anderson et al. 2018). In fly larvae, stress granules were not apparent  
215 after single TBI events at  $60^\circ$ , minimally increased after 4HITs, and substantially increased after  
216 8HITs in an apparently synergistic fashion (Anderson et al. 2018). Alternatively, glutamate  
217 release and elevated extracellular potassium are observed immediately or within minutes of TBI  
218 (Faden et al. 1989; Katayama et al. 1990). Moreover, extracellular potassium scaled with injury

## Expansion of a fly TBI model and synergistic effects

219 severity until plateauing for severe injuries, and changes in extracellular potassium were  
220 blocked by addition of tetrodotoxin for moderate but not severe injuries (Katayama et al. 1990).  
221 Thus, dysregulation of neuronal excitability and extracellular potassium operate on short time-  
222 scales and are responsive to injury severity, which are compatible with our observed synergistic  
223 effects for injuries at short inter-injury intervals and for moderate, but not severe TBI.  
224 Downstream consequences of misregulated neurotransmission and extracellular potassium are  
225 varied, but may include changes in oxidative stress and inflammation (Guerriero et al. 2015;  
226 Fehily and Fitzgerald 2017; Khatri et al. 2018).

227 The exact secondary mechanisms underlying the fast synergistic effects we observed are thus  
228 far unknown. Moreover, we do not know if synergistic effects at mild to moderate TBI conditions  
229 in our model drive other TBI-related consequences observed in flies such as changes in  
230 lifespan, motor function or inflammation (Katzenberger et al. 2013, 2015, 2016; Barekat et al.  
231 2016; Anderson et al. 2018). However, our fly model offers an unparalleled platform for rapidly,  
232 and systematically, testing candidate factors or pathways for their involvement in TBI outcomes  
233 across injury severities, number, and inter-injury interval. Recognition and elucidation of cellular  
234 and molecular differences in response to mild vs moderate, and single vs multiple TBI events,  
235 will be important in determining optimal disease-intervention strategies. Our extended model will  
236 be central to these efforts going forward.

## Expansion of a fly TBI model and synergistic effects

237 **Acknowledgements:** The authors thank members of the Human Biology Department at the  
238 University of Wisconsin – Green Bay for careful reading of the manuscript and suggested  
239 revisions. We also thank Dr. C. Andrew Frank, Dr. Tina Tootle, Dr. Atulya Iyengar, and Dr.  
240 Javier Gomez for reading the manuscript and offering revisions, and for their support in  
241 answering many questions about lab set-up and publication. We also thank Mark Damie and  
242 Joe Schoenebeck of the University of Wisconsin – Green Bay for assistance in lab set-up.

243 **Declarations of Interests:** The authors have no conflicts of interest.

244 **Funding:** This work was supported by University of Wisconsin – Green Bay Start-Up Funds and  
245 Medical College of Wisconsin Professional Development Funds.

246 **LITERATURE CITED**

- 247 **Anderson EN, Gochenaur L, Singh A, Grant R, Patel K, Watkins S, Wu JY, Pandey UB.**  
248 Traumatic injury induces stress granule formation and enhances motor dysfunctions in ALS/FTD  
249 models. *Hum Mol Genet* 27: 1366–1381, 2018.
- 250 **Bailes JE, Petraglia AL, Omalu BI, Nauman E, Talavage T.** Role of subconcussion in  
251 repetitive mild traumatic brain injury. *J Neurosurg* 119: 1235–1245, 2013.
- 252 **Baldwin GT, Breiding MJ, Dawn Comstock R.** Epidemiology of sports concussion in the  
253 United States. In: *Handbook of clinical neurology*, p. 63–74.
- 254 **Barekat A, Gonzalez A, Mauntz RE, Kotzebue RW, Molina B, El-Mecharrarie N, Conner CJ,**  
255 **Garza S, Melkani GC, Joiner WJ, Lipinski MM, Finley KD, Ratliff EP.** Using *Drosophila* as an  
256 integrated model to study mild repetitive traumatic brain injury. *Sci Rep* 6: 25252, 2016.
- 257 **Bolton AN, Saatman KE.** Regional Neurodegeneration and Gliosis Are Amplified by Mild  
258 Traumatic Brain Injury Repeated at 24-Hour Intervals. *J Neuropathol Exp Neurol* 73: 933, 2014.
- 259 **Bolton Hall AN, Joseph B, Brelsfoard JM, Saatman KE.** Repeated Closed Head Injury in  
260 Mice Results in Sustained Motor and Memory Deficits and Chronic Cellular Changes. *PLoS One*  
261 11: e0159442, 2016.
- 262 **Cassidy JD, Carroll LJ, Peloso PM, Borg J, von Holst H, Holm L, Kraus J, Coronado VG,**  
263 **WHO Collaborating Centre Task Force on Mild Traumatic Brain Injury.** Incidence, risk  
264 factors and prevention of mild traumatic brain injury: results of the WHO Collaborating Centre  
265 Task Force on Mild Traumatic Brain Injury. *J Rehabil Med* : 28–60, 2004.
- 266 **Crisco JJ, Fiore R, Beckwith JG, Chu JJ, Brolinson PG, Duma S, McAllister TW, Duhaime**  
267 **A-C, Greenwald RM.** Frequency and Location of Head Impact Exposures in Individual  
268 Collegiate Football Players. *J Athl Train* 45: 549–559, 2010.
- 269 **DeKosky ST, Asken BM.** Injury cascades in TBI-related neurodegeneration. *Brain Inj* 31:  
270 1177–1182, 2017.
- 271 **Faden AI, Demediuk P, Panter SS, Vink R.** The role of excitatory amino acids and NMDA  
272 receptors in traumatic brain injury. *Science* 244: 798–800, 1989.
- 273 **Fehily B, Fitzgerald M.** Repeated Mild Traumatic Brain Injury. *Cell Transplant* 26: 1131–1155,  
274 2017.
- 275 **Friess SH, Ichord RN, Ralston J, Ryall K, Helfaer MA, Smith C, Margulies SS.** Repeated  
276 traumatic brain injury affects composite cognitive function in piglets. *J Neurotrauma* 26: 1111–  
277 21, 2009.
- 278 **Gold EM, Vasilevko V, Hasselmann J, Tiefenthaler C, Hoa D, Ranawaka K, Cribbs DH,**  
279 **Cummings BJ.** Repeated Mild Closed Head Injuries Induce Long-Term White Matter Pathology  
280 and Neuronal Loss That Are Correlated With Behavioral Deficits. *ASN Neuro* 10:  
281 175909141878192, 2018.
- 282 **Guerriero RM, Giza CC, Rotenberg A.** Glutamate and GABA imbalance following traumatic  
283 brain injury. *Curr Neurol Neurosci Rep* 15: 27, 2015.
- 284 **Helmick KM, Spells CA, Malik SZ, Davies CA, Marion DW, Hinds SR.** Traumatic brain injury  
285 in the US military: epidemiology and key clinical and research programs. *Brain Imaging Behav*  
286 9: 358–366, 2015.

Expansion of a fly TBI model and synergistic effects

- 287 **Holm L, David Cassidy J, Carroll L, Borg J, Neurotrauma Task Force on Mild Traumatic**  
288 **Brain Injury of the WHO Collaborating Centre.** Summary of the WHO collaborating centre for  
289 neurotrauma task force on mild traumatic brain injury. *J Rehabil Med* 37: 137–141, 2005.
- 290 **Huang L, Coats JS, Mohd-Yusof A, Yin Y, Assaad S, Muellner MJ, Kamper JE, Hartman**  
291 **RE, Dulcich M, Donovan VM, Oyoyo U, Obenaus A.** Tissue vulnerability is increased  
292 following repetitive mild traumatic brain injury in the rat. *Brain Res* 1499: 109–120, 2013.
- 293 **Katayama Y, Becker DP, Tamura T, Hovda DA.** Massive increases in extracellular potassium  
294 and the indiscriminate release of glutamate following concussive brain injury. *J Neurosurg* 73:  
295 889–900, 1990.
- 296 **Katzenberger RJ, Chtarbanova S, Rimkus SA, Fischer JA, Kaur G, Seppala JM, Swanson**  
297 **LC, Zajac JE, Ganetzky B, Wassarman DA.** Death following traumatic brain injury in  
298 *Drosophila* is associated with intestinal barrier dysfunction. *Elife* 4, 2015.
- 299 **Katzenberger RJ, Ganetzky B, Wassarman DA.** Age and Diet Affect Genetically Separable  
300 Secondary Injuries that Cause Acute Mortality Following Traumatic Brain Injury in *Drosophila*.  
301 *G3 (Bethesda)* 6: 4151–4166, 2016.
- 302 **Katzenberger RJ, Loewen CA, Wassarman DR, Petersen AJ, Ganetzky B, Wassarman DA.**  
303 A *Drosophila* model of closed head traumatic brain injury. *Proc Natl Acad Sci U S A* 110:  
304 E4152-9, 2013.
- 305 **Kerr ZY, Roos KG, Djoko A, Dalton SL, Broglio SP, Marshall SW, Dompier TP.**  
306 Epidemiologic Measures for Quantifying the Incidence of Concussion in National Collegiate  
307 Athletic Association Sports. *J Athl Train* 52: 167, 2017.
- 308 **Khatri N, Thakur M, Pareek V, Kumar S, Sharma S, Datusalia AK.** Oxidative Stress: Major  
309 Threat in Traumatic Brain Injury. *CNS Neurol Disord Drug Targets* 17: 689–695, 2018.
- 310 **Laurer HL, Bareyre FM, Lee VMYC, Trojanowski JQ, Longhi L, Hoover R, Saatman KE,**  
311 **Raghupathi R, Hoshino S, Grady MS, McIntosh TK.** Mild head injury increasing the brain's  
312 vulnerability to a second concussive impact. *J Neurosurg* 95: 859–870, 2001.
- 313 **Lehman EJ, Hein MJ, Baron SL, Gersic CM.** Neurodegenerative causes of death among  
314 retired National Football League players. *Neurology* 79: 1970–1974, 2012.
- 315 **Levin HS, Robertson CS.** Mild traumatic brain injury in translation. *J Neurotrauma* 30: 610–7,  
316 2013.
- 317 **Longhi L, Saatman KE, Fujimoto S, Raghupathi R, Meaney DF, Davis J, McMillan B S A,**  
318 **Conte V, Laurer HL, Stein S, Stocchetti N, McIntosh TK.** Temporal window of vulnerability to  
319 repetitive experimental concussive brain injury. *Neurosurgery* 56: 364–74, 2005.
- 320 **Marar M, McIlvain NM, Fields SK, Comstock RD.** Epidemiology of Concussions Among  
321 United States High School Athletes in 20 Sports. *Am J Sports Med* 40: 747–755, 2012.
- 322 **Marchi N, Bazarian JJ, Puvenna V, Janigro M, Ghosh C, Zhong J, Zhu T, Blackman E,**  
323 **Stewart D, Ellis J, Butler R, Janigro D.** Consequences of Repeated Blood-Brain Barrier  
324 Disruption in Football Players. *PLoS One* 8: e56805, 2013.
- 325 **Meehan WP, Zhang J, Mannix R, Whalen MJ.** Increasing Recovery Time Between Injuries  
326 Improves Cognitive Outcome After Repetitive Mild Concussive Brain Injuries in Mice.  
327 *Neurosurgery* 71: 885–892, 2012.

Expansion of a fly TBI model and synergistic effects

- 328 **Mouzon B, Chaytow H, Crynen G, Bachmeier C, Stewart J, Mullan M, Stewart W, Crawford**  
329 **F.** Repetitive Mild Traumatic Brain Injury in a Mouse Model Produces Learning and Memory  
330 Deficits Accompanied by Histological Changes. *J Neurotrauma* 29: 2761–2773, 2012.
- 331 **Nordström A, Nordström P.** Traumatic brain injury and the risk of dementia diagnosis: A  
332 nationwide cohort study. *PLoS Med* 15: e1002496, 2018.
- 333 **Ojo JO, Mouzon B, Algamal M, Leary P, Lynch C, Abdullah L, Evans J, Mullan M,**  
334 **Bachmeier C, Stewart W, Crawford F.** Chronic Repetitive Mild Traumatic Brain Injury Results  
335 in Reduced Cerebral Blood Flow, Axonal Injury, Gliosis, and Increased T-Tau and Tau  
336 Oligomers. *J Neuropathol Exp Neurol* 75: 636, 2016.
- 337 **Taylor CA, Bell JM, Breiding MJ, Xu L.** Traumatic Brain Injury–Related Emergency  
338 Department Visits, Hospitalizations, and Deaths — United States, 2007 and 2013. *MMWR*  
339 *Surveill Summ* 66: 1–16, 2017.
- 340 **Weil ZM, Gaier KR, Karelina K.** Injury timing alters metabolic, inflammatory and functional  
341 outcomes following repeated mild traumatic brain injury. *Neurobiol Dis* 70: 108–116, 2014.
- 342 **Wilk JE, Herrell RK, Wynn GH, Riviere LA, Hoge CW.** Mild Traumatic Brain Injury  
343 (Concussion), Posttraumatic Stress Disorder, and Depression in U.S. Soldiers Involved in  
344 Combat Deployments. *Psychosom Med* 74: 249–257, 2012.
- 345



Expansion of a fly TBI model and synergistic effects

346 **Table 1:** Full reporting of categorical count data for all TBI conditions.

| <b>Genotype</b>                   | <b>Angle of Deflection</b> | <b>HITs</b>   | <b>Alive @ 24Hrs</b> | <b>Dead @ 24Hrs</b> | <b>MI<sub>24</sub></b> |
|-----------------------------------|----------------------------|---------------|----------------------|---------------------|------------------------|
| <i>w<sup>1118</sup></i>           | 0 – uninjured              | 0 – uninjured | 1325                 | 0                   | 0.0                    |
| <i>y<sup>1</sup>w<sup>1</sup></i> | 0 – uninjured              | 0 – uninjured | 1256                 | 3                   | 0.2                    |
| <i>w<sup>1118</sup></i>           | 60°                        | 1             | 837                  | 1                   | 0.1                    |
|                                   |                            | 2             | 1453                 | 9                   | 0.6                    |
|                                   |                            | 3             | 1104                 | 9                   | 0.8                    |
|                                   |                            | 4             | 864                  | 33                  | 3.7                    |
| <i>y<sup>1</sup>w<sup>1</sup></i> | 60°                        | 1             | 806                  | 8                   | 1.0                    |
|                                   |                            | 2             | 959                  | 16                  | 1.6                    |
|                                   |                            | 3             | 807                  | 29                  | 3.5                    |
|                                   |                            | 4             | 748                  | 124                 | 14.2                   |
| <i>w<sup>1118</sup></i>           | 70°                        | 1             | 1108                 | 15                  | 1.3                    |
|                                   |                            | 2             | 1391                 | 55                  | 3.8                    |
|                                   |                            | 3             | 984                  | 71                  | 6.7                    |
|                                   |                            | 4             | 797                  | 138                 | 14.8                   |
| <i>y<sup>1</sup>w<sup>1</sup></i> | 70°                        | 1             | 887                  | 18                  | 2.0                    |
|                                   |                            | 2             | 962                  | 47                  | 4.7                    |
|                                   |                            | 3             | 773                  | 164                 | 17.5                   |
|                                   |                            | 4             | 524                  | 236                 | 31.1                   |
| <i>w<sup>1118</sup></i>           | 80°                        | 1             | 689                  | 19                  | 2.7                    |
|                                   |                            | 2             | 1313                 | 128                 | 8.9                    |
|                                   |                            | 3             | 887                  | 201                 | 18.5                   |
|                                   |                            | 4             | 570                  | 277                 | 32.7                   |
| <i>y<sup>1</sup>w<sup>1</sup></i> | 80°                        | 1             | 733                  | 64                  | 8.0                    |
|                                   |                            | 2             | 718                  | 156                 | 17.8                   |
|                                   |                            | 3             | 561                  | 265                 | 32.1                   |
|                                   |                            | 4             | 334                  | 343                 | 50.7                   |
| <i>w<sup>1118</sup></i>           | 90°                        | 1             | 568                  | 66                  | 10.4                   |
|                                   |                            | 2             | 985                  | 386                 | 28.2                   |
|                                   |                            | 3             | 602                  | 512                 | 46.0                   |
|                                   |                            | 4             | 342                  | 390                 | 53.3                   |
| <i>y<sup>1</sup>w<sup>1</sup></i> | 90°                        | 1             | 735                  | 137                 | 15.7                   |
|                                   |                            | 2             | 607                  | 312                 | 33.9                   |
|                                   |                            | 3             | 283                  | 459                 | 61.9                   |
|                                   |                            | 4             | 105                  | 467                 | 81.6                   |



Expansion of a fly TBI model and synergistic effects

347 **Table 2:** Full reporting of line-fit slopes for MI<sub>24</sub>/HIT data and resulting p-values.

| <u>Genotype</u>                             | <u>Angle of Deflection</u> | <u>Slope +/- SE</u> | <u>95% CI of slope</u> | <u>Significantly non-zero slope?</u> | <u>p-value</u> |
|---------------------------------------------|----------------------------|---------------------|------------------------|--------------------------------------|----------------|
| <i>w</i> <sup>1118</sup>                    | 60                         | 0.24 +/- 0.1        | -0.18 to 0.66          | no                                   | 0.136          |
| <i>y</i> <sup>1</sup> <i>w</i> <sup>1</sup> | 60                         | 0.81 +/- 0.42       | -1.00 to 2.61          | no                                   | 0.195          |
| <i>w</i> <sup>1118</sup>                    | 70                         | 0.74 +/- 0.17       | 0.02 to 1.46           | <b>yes</b>                           | <b>0.048</b>   |
| <i>y</i> <sup>1</sup> <i>w</i> <sup>1</sup> | 70                         | 2.08 +/- 0.42       | 0.28 to 3.89           | <b>yes</b>                           | <b>0.038</b>   |
| <i>w</i> <sup>1118</sup>                    | 80                         | 1.82 +/- 0.05       | 1.61 to 2.03           | <b>yes</b>                           | <b>0.001</b>   |
| <i>y</i> <sup>1</sup> <i>w</i> <sup>1</sup> | 80                         | 1.57 +/- 0.18       | 0.81 to 2.33           | <b>yes</b>                           | <b>0.013</b>   |
| <i>w</i> <sup>1118</sup>                    | 90                         | 1.00 +/- 0.90       | -2.87 to 4.86          | no                                   | 0.382          |
| <i>y</i> <sup>1</sup> <i>w</i> <sup>1</sup> | 90                         | 1.77 +/- 0.50       | -0.37 to 3.92          | no                                   | 0.071          |

348

## Expansion of a fly TBI model and synergistic effects

349 **Figure 1**

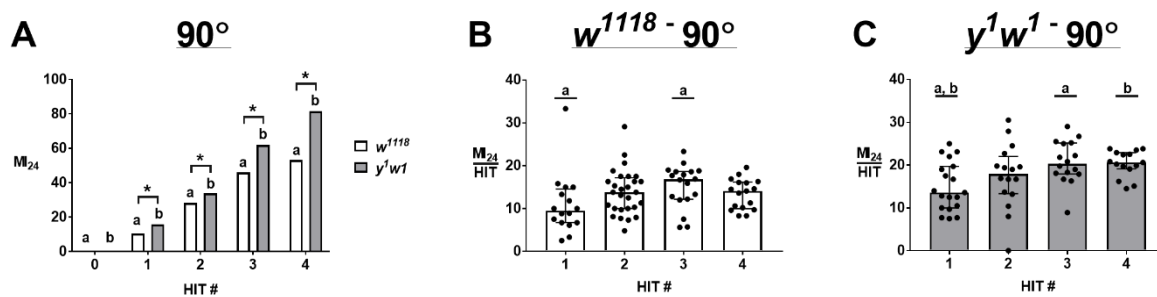

350

## Expansion of a fly TBI model and synergistic effects

351 **Figure 2**

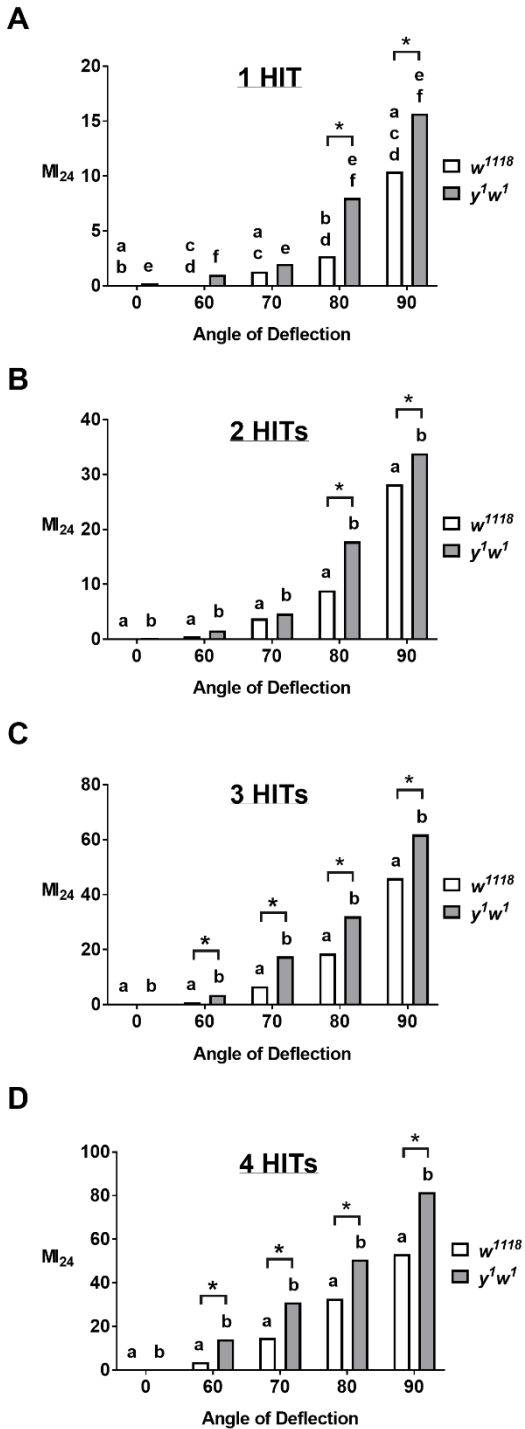

352

Expansion of a fly TBI model and synergistic effects

353 **Figure 3**

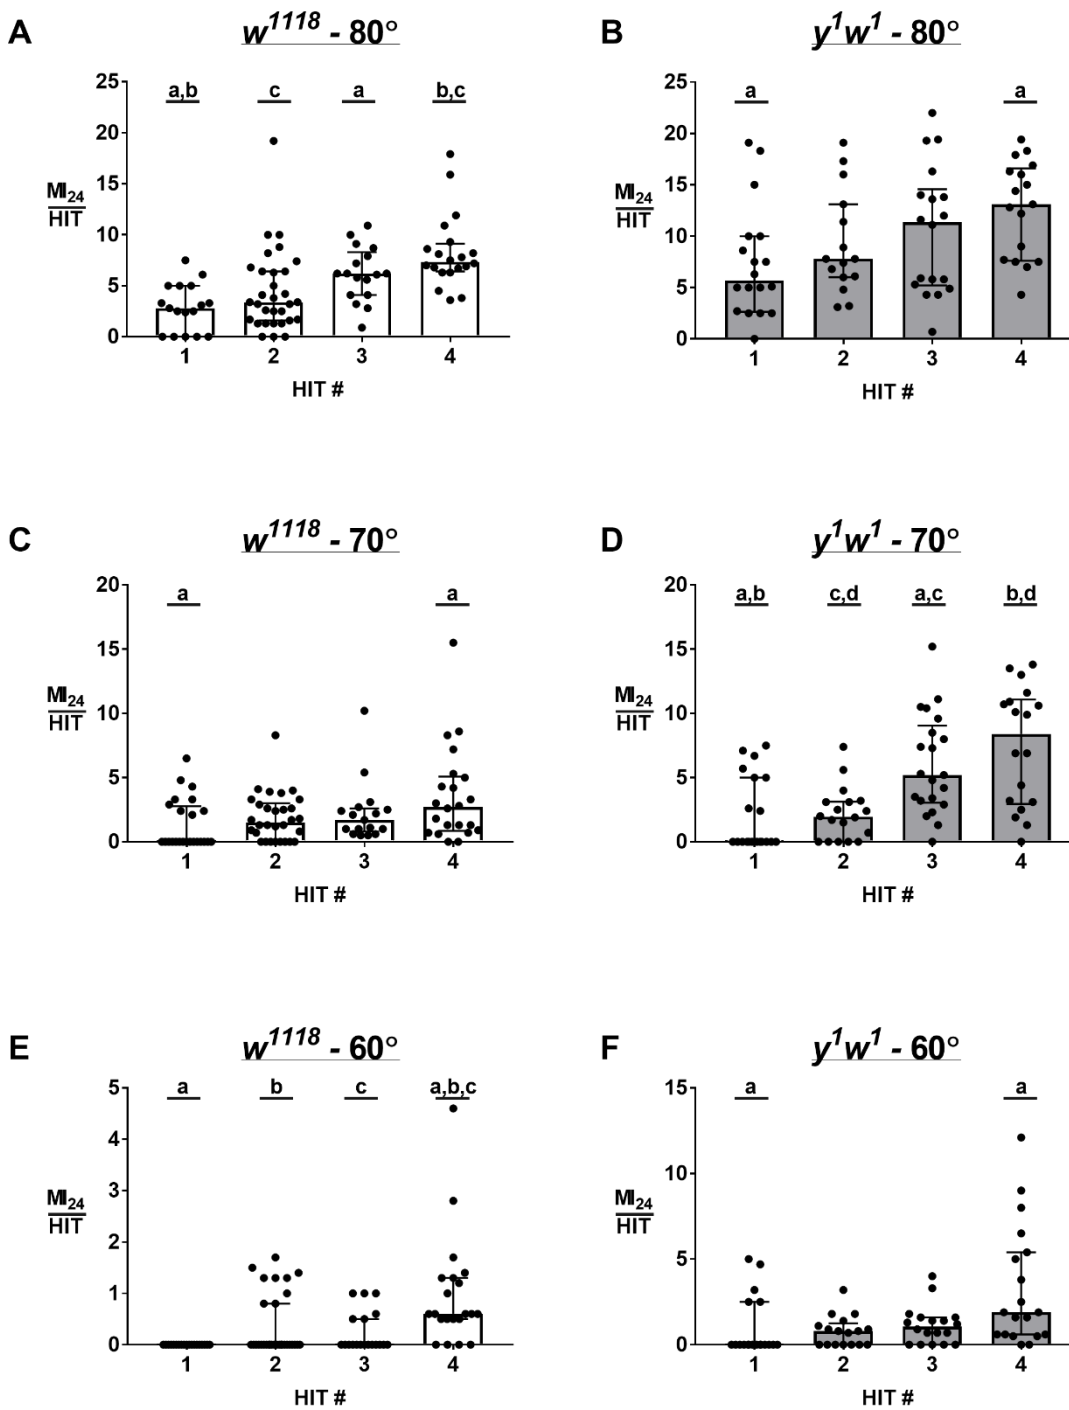

354

## Expansion of a fly TBI model and synergistic effects

355 **Figure 1:** Increasing HIT number at 90° deflection increases  $MI_{24}$  and reveals differences in  $MI_{24}$   
356 per hit. (A)  $MI_{24}$  values increase with HIT number in both  $w^{1118}$  and  $y^1w^1$ , with  $y^1w^1$  suffering  
357 greater  $MI_{24}$  across all HIT numbers. Zero HITs represents uninjured controls. Conditions that  
358 share a letter are statistically different ( $p \leq 0.0023$ ,  $\alpha = 0.005$ ), while (\*) indicates differences  
359 between genotypes ( $p \leq 0.0029$ ,  $\alpha = 0.01$ ) by Fisher's Exact Test with Bonferroni correction.  $n \geq$   
360 572 flies for each condition. (B, C)  $MI_{24}$  values were divided by HIT number for  $w^{1118}$  (B) and  
361  $y^1w^1$  (C). Data plotted are medians with interquartile ranges, with individual data points for each  
362 vial of at least 30 flies. Conditions that share a letter are statistically different ( $p < 0.05$ ,  $\alpha = 0.05$   
363 by Kruskal-Wallis with Dunn's correction,  $n \geq 15$  vials for each condition).

364  
365 **Figure 2:** Mortality is reduced at smaller angles of deflection. Flies were administered 1-4HITs  
366 (A-D as indicated) at designated angles of deflection from 60° to 90°. Zero degrees represents  
367 uninjured controls. Conditions that share a letter are statistically different ( $p \leq 0.0042$ ,  $\alpha =$   
368 0.005), while (\*) indicates differences between genotypes ( $p \leq 0.0035$ ,  $\alpha = 0.01$ ) by Fisher's  
369 Exact Test with Bonferroni correction.  $n \geq 572$  flies for each condition.

370  
371 **Figure 3:** Differences in  $MI_{24}$  per hit are readily apparent for sub-90° injury conditions.  $MI_{24}$   
372 values were divided by HIT number for  $w^{1118}$  and  $y^1w^1$  as indicated at angles of deflection of 80°  
373 (A, B), 70° (C, D) and 60° (E, F). Data plotted are medians with interquartile ranges, with  
374 individual data points for each vial of at least 30 flies. Conditions that share a letter are  
375 statistically different ( $p < 0.05$ ,  $\alpha = 0.05$  by Kruskal-Wallis with Dunn's correction,  $n \geq 15$  vials for  
376 each condition).
